# Supplementary material for: Evaluation of NaCl and MgCl2 heat exchange fluids in a deep binary geothermal system in a sedimentary halite formation
Source: Research Square preprint supplement (doi:10.21203/rs.3.rs-29544/v3), 2020-12-29
Supplement: Supplementary file 1 [file 0cf92e24e36e167c87a4c481.docx]

| NaCl-brine Heating | #formation_fluid  solution 1  -units mol/kgw  temp 10  Ca 2.59e-2  Cl 6.737  Fe 2.76e-6  K 1.78e-2  Mg 5.02e-4  Na 5.467  S 3.69e-2  Equilibrium_Phases  Halite    REACTION_TEMPERATURE 1  10 120 in 12 |
| --- | --- |
| NaCl-brine Cooling | #formation_fluid  solution 1  -units mol/kgw  temp 120  pH 5.683  Ca 2.59e-2  Cl 7.566  Fe 2.76e-6  K 1.78e-2  Mg 5.02e-4  Na 6.296  S 3.69e-2  Equilibrium_Phases  Halite    REACTION_TEMPERATURE 1  120 10 in 12 |

| MgCl2-brine Heating | #formation_fluid  solution 1  -units mol/kgw  temp 10  Ph 7.0  Cl 11.55  Mg 5.591  Na 0  Equilibrium_Phases  Halite    REACTION_TEMPERATURE 1  10 120 in 12 |
| --- | --- |
| MgCl2-brine Cooling | #formation_fluid  solution 1  -units mol/kgw  temp 120  PH 5.1  Cl 1.193e+01  Mg 5.591e+00  Na 3.811e-01  Equilibrium_Phases  Halite    REACTION_TEMPERATURE 1  120 10 in 12 |

| NaCl-MgCl2-brine Heating | #formation_fluid  solution  -units mol/kgw  temp 10  pH 6.7  Ca 5.76E-03  Ca 5.76E-03  Cl 11.45  Fe 3.00E-07  K 1.93E-03  Mg 5.614  Na 7.53E-02  S 6.95E-03  Equilibrium_Phases  Halite    REACTION_TEMPERATURE 1  10 120 in 12 |
| --- | --- |
| NaCl-MgCl2-brine Cooling | #formation_fluid  solution  -units mol/kgw  temp 120  pH 4.86  Ca 5.76E-03  Cl 1.18E+01  Fe 3.00E-07  K 1.93E-03  Mg 5.61E+00  Na 3.82E-01  S 6.95E-03  Equilibrium_Phases  Halite  REACTION_TEMPERATURE 1  120 10 in 12 |
